# Supplementary material for: Transcriptome Analysis Identifies ALCAM Overexpression as a Prognosis Biomarker in Laryngeal Squamous Cell Carcinoma
Source: MDPI journal article supplement (doi:10.3390/cancers12020470), 2020-02-18
Supplement: s1 [file s1]

# Supplementary Material: Transcriptome Analysis Identifies ALCAM Overexpression as a Prognosis Biomarker in Laryngeal Squamous Cell Carcinoma

Pedro Nicolau-Neto, Paulo Thiago de Souza-Santos, Mariana Ramundo, Priscila Valverde, Ivanir Martins, Izabella Costa, Fernando Dias, Tatiana de Almeida Simão and Luis Felipe Ribeiro Pinto

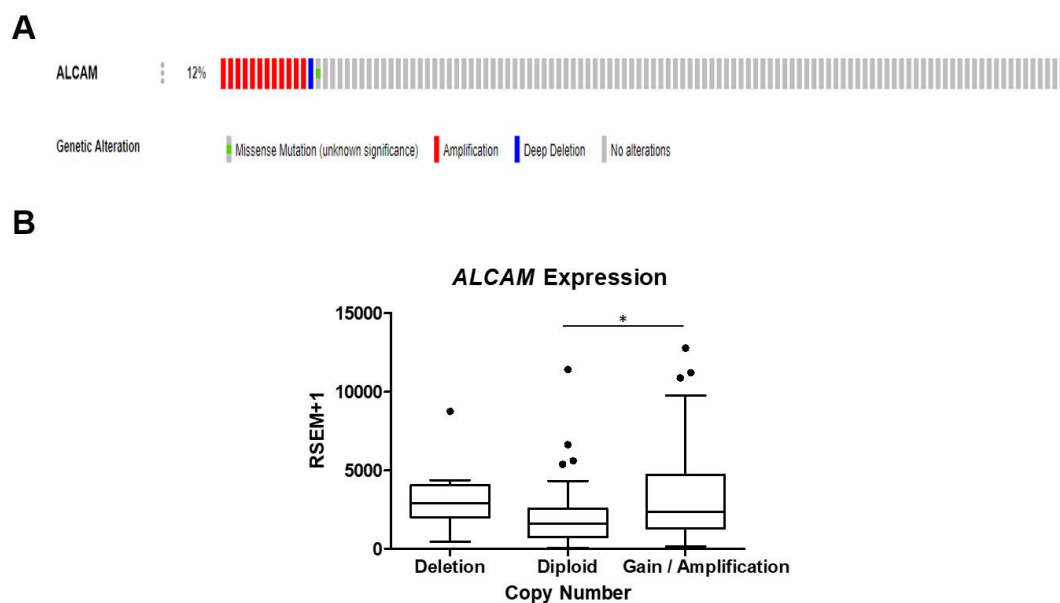

Figure S1. Somatic alterations in ALCAM gene.

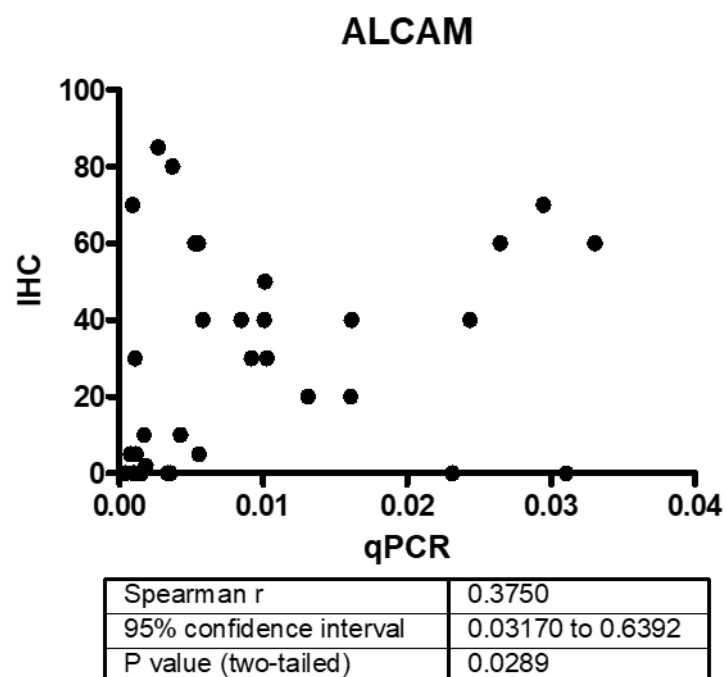

Figure S2. ALCAM expression correlation between quantitative PCR (qPCR) and immunohistochemistry (IHC)

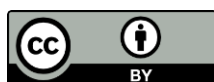

© 2020 by the authors. Licensee MDPI, Basel, Switzerland. This article is an open access article distributed under the terms and conditions of the Creative Commons Attribution (CC BY) license (<http://creativecommons.org/licenses/by/4.0/>).
